**Title:** Subarachnoid EDTA Induces Hindlimb Myoclonus in Rats  
**Authors:** BC Wang MD, D Li MS, JM Hiller PhD, EJ Simon PhD,<sup>†</sup>  
G Budzilovich MD,<sup>\*\*</sup> DE Hillman PhD,<sup>#</sup> H Turndorf MD.<sup>\*\*</sup>

**Affiliation:** Departments of Anesthesiology, Psychiatry,  
Pharmacology, Pathology,<sup>\*\*</sup> Physiology,<sup>#</sup> New York  
University School of Medicine, New York, NY 10016.

**Introduction:** Recently, Sodium bisulfite, antioxidant in 2-chloro-  
procaine Nesacaine (CE), has been replaced by a chelator,  
disodium EDTA dihydrate. Literature review revealed that EDTA  
has multiple adverse effects including teratogenicity,<sup>1</sup> collagen  
fibril depletion,<sup>2</sup> intestinal villi shortening,<sup>3</sup> neural crest tumor  
formation and cell death in rats/mice,<sup>4</sup> hepatic necrosis in  
calves,<sup>5</sup> and contact allergy,<sup>6</sup> vasculitis, cardiac tamponade,  
hemolytic anemia and renal damage in man.<sup>7,8</sup> This study focused  
on the EDTA effects in the subarachnoid space (SAS) in rats.

**Method:** With institutional approval, under intraperitoneal  
ketamine anesthesia 75-100 mg/kg, subarachnoid catheters were  
implanted through lumbar laminectomies in 500-600 gram male  
Sprague Dawley rats. One week postsurgery, catheter position  
was verified by induction of spinal anesthesia with 0.5 ml of 1.5%  
lidocaine. One week after this test, animals were divided into 2  
groups: G1 (n=6) received SAS normal saline (NS) 0.05 ml, pH 5,  
hourly for 3-4 hrs. G2 (n=8) received SAS, 0.05 ml of 0.1% EDTA  
pH 4.5 hourly for 3-7 hours. Some rats in G2 were injected with  
EDTA again at a later date. The number of injections varied  
between 4-15.

**Results:** Group 1 did not have any motor abnormality following  
the NS injection. One minute after the 3rd to 15th EDTA injection,  
7 of 8 rats circled continuously for several minutes. This was  
followed by hindlimb clonus for 15-20 minutes. The myoclonic  
contractions were 100+ per minute. Two rats developed hindlimb  
paralysis (HLP) post EDTA injection: one after receiving the 3rd  
& 6th, and the other, following the 5th injection. One animal  
underwent euthanasia with IV pentobarbital for histological  
examination after sustaining HLP for 10 days secondary to the 7th

injection. Table 1 summarizes the results.

Tab.1. SUBARACHNOID EDTA IN RATS

| #  | Inj | EDTA | Clonus                              | HLP                    | Recovery | Death       | Sacrifice      |
|----|-----|------|-------------------------------------|------------------------|----------|-------------|----------------|
| 1  | 6   | 0.3  | 0                                   | 0                      | NA       | 0           | NA             |
| 2  | 6   | 0.3  | 3rd (15')<br>6th (10')              | 3rd (10')<br>6th (10d) | +        |             | +              |
| 3  | 3   | 0.15 |                                     |                        |          |             |                |
| 4  | 9   | 0.45 | 3rd (16')<br>7th (18')              |                        | +        |             |                |
| 5  | 4   | 0.2  | 4th (17')                           |                        | +        | +           |                |
| 6  | 15  | 0.75 | 2nd (20')<br>15th (14')             | 5th (2d)               | +        | 0           | NA             |
| 7. | 11  | 0.55 | 3rd (15')                           | 0                      | +        | 0           | NA             |
| 8  | 11  | 0.55 | 4th (15')<br>5th (13')<br>7th (15') | 0<br>0<br>0            | +        | 0<br>0<br>0 | NA<br>NA<br>NA |

Legend: #=rat number, Inj= injection number, EDTA in mg, Clonus(hindlimb) preceded by # of Inj when clonus occurred, followed by (minutes)=duration of clonus, Recovery= recovery from HLP and clonus, NA=not applicable, Sacrifice= euthanasia for histological examination.

**Histological examination disclosed active, moderate to severe  
Wallerian degeneration of some lumbar sacral roots.**

**Discussion:** Data show that subarachnoid EDTA alters neurological  
function and may be toxic in rats. Myoclonic seizures have been  
reported in rats following a 10-fold analgesic dose of morphine.<sup>9</sup>  
Relationship of the mechanism of action between EDTA and  
morphine is unknown. Accidental dura puncture is always a risk  
with epidural anesthesia. Drugs intended for epidural use, could  
enter SAS inadvertently. Therefore, incorporating EDTA in epidural  
anesthetics is unwise before safety is established.

**References:**

1. *Toxicol Appl Pharmacol* 82:426-443, 1986.
2. *Pharmacol Res Commun* 20:133-146, 1988.
3. *Exp Mol Pathol* 28:215-226, 1978.
4. *Anat Anz* 166:209-217, 1988.
5. *J Am Vet Med Assoc* 4:406-409, 1986.
6. *Contact Dermatitis* 15:250-252, 1986.
7. *JAMA* 250:2926, 1983.
8. *JAMA* 250:672, 1983.
9. *Acta Pharmacol et Toxicol* 56:50-54, 1985.

**TITLE:** Antinociceptive Effect of Intrathecal Midazolam  
and Fentanyl in the Sheep  
**AUTHORS:** Valerie A. Arkoosh, M.D., Mark C. Norris, M.D.  
**AFFILIATION:** Department of Anesthesiology, Thomas  
Jefferson University, Philadelphia, PA, 19107

**INTRODUCTION:** Intrathecally administered midazolam(M)  
produces segmental analgesia by a non-opiate spinal mechanism in  
the rat.<sup>1</sup> To further understand this action, we examined the effect  
of intrathecal M and fentanyl(F) on electrical current threshold for  
pain in conscious, unrestrained sheep.

**METHODS:** Adult mixedbreed western male sheep were studied in  
this IACUC approved study. Under local anesthesia both a 20g  
subarachnoid catheter, at the level of the last lumbar vertebra, and  
a femoral artery cannula were inserted. Following a 48h recovery, a  
pair of surface electrodes were placed on both the flank and  
shoulder with a fixed inter-electrode distance of 8cm and connected  
to a Grass S5 stimulator. Antinociception was measured at both the  
shoulder and flank by increasing stimulus intensity in 10 volt  
increments up to 80 volts or until an avoidance response was seen.  
Intrathecal dose response curves were determined by injecting  
saline, M (0.3, 1, 3mg), F (0.003, 0.01, 0.03mg) and M/F combinations  
(0.1/0.001, 0.3/0.003, 1.0/0.01mg) in a randomized, blinded manner  
with a minimum of 24h between injections. Measurements of HR,  
BP and antinociception were made at 0, 5, 10, 20, 30, 60, 90 and 120  
min and ABG at 0, 30, 60, 90 and 120 min. The percent maximum  
possible effect (%MPE) was calculated for each sheep at each dose  
and time. Two-way analysis of variance for repeated measures was  
used to compare arterial blood gas and hemodynamic data within  
and between groups.

**RESULTS:** Six sheep were evaluated in this study. F, M, and M/F  
produced dose related segmental antinociceptive effects. Antinociception  
increased linearly with increasing doses of M and F. However, with M/F,  
antinociception was greater following the 0.3/0.003mg dose than following  
the larger 1.0/0.01mg dose (Fig.).

No drug had any significant effect on blood gas or hemodynamic  
parameters.

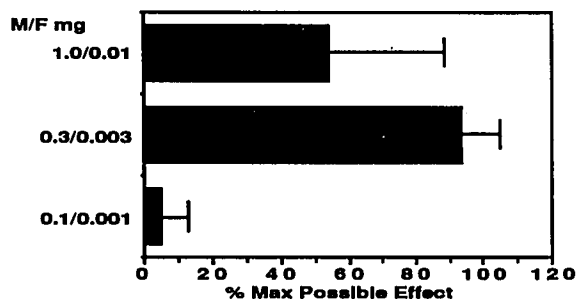

**DISCUSSION:** Benzodiazepines are not normally considered to be  
analgesics. However, when administered intrathecally in the rat, M  
produces segmental antinociception to electrical current threshold  
for pain, reversible by the benzodiazepine antagonist flumazenil.  
We successfully demonstrated a segmental antinociceptive effect  
from intrathecal M in adult sheep. However, the interaction of M  
with F seen in this study is complex. A similar inhibitory trend  
with higher M doses has been reported between intrathecal M and  
morphine in the rat.<sup>2</sup> Additionally, systemic M antagonizes the  
analgesic effect of systemic morphine.<sup>3</sup> Perhaps systemic absorption  
of the largest dose of M antagonizes the spinally mediated analgesic  
effects of M/F.

**REFERENCES:**

1. *Anesthesiology* 70:780-786, 1989
2. *Anesthesiology* 71:A681, 1989
3. *Anesth Analg* 66:944-947, 1987
